# Supplementary material for: High Level of Uromodulin Increases the Risk of Hypertension: A Mendelian Randomization Study
Source: PubMed Central journal article supplement (PMC8440862; doi:10.3389/fcvm.2021.736001), 2021-09-01

## Supplementary materials

Table S1. Details of the UMOD related SNPs. uUMOD related SNPs were derived from the Genome-Wide Association Studies (GWAS) meta-analysis in GWAScatalog. A total of seventeen SNPs associated with uUMOD were from an article published in the Journal of American Society of Nephrology.

*EA*, Effect allele; *OA*, Other allele; *EAF*, Effect Allele Frequency; *BETA*, Effect size of SNP on uromodulin; *SE*, Standard Error; *uUMOD*, urinary uromodulin; *sUMOD*, serum uromodulin; *SNPs*, Single Nucleotide Polymorphisms

Table S2. The variance ( $R^2$ ) of UMOD-blood pressure pairs. *SNP*, Single Nucleotide Polymorphism; *UMOD*, uromodulin

Table S3. Studies of hypertension with data available from the Mendelian randomization (MR)-base.

Outcomes of the "hypertension" and "high blood pressure" searched in MR-base were shown in the table. We selected the *ukb-b-14057* and *ukb-b-14177* since their largest *Ncase* and the sample size.

Table S4. Studies of systolic blood pressure and diastolic blood pressure from the Mendelian randomization (MR)-base. We selected *ieu-b-38* and *ukb-b-20175* as the outcome of systolic blood pressure, while *ieu-b-39* and *ukb-b-7992* as the outcome of diastolic blood pressure. *ICBP*, International Consortium for Blood Pressure; *NSNPs*, Number of Single Nucleotide Polymorphisms

Table S5. Detailed power of each pair. *UMOD*, uromodulin; *SBP*, Systolic blood pressure; *DBP*, diastolic blood pressure

Figure S1. Leave-one-out method of the Mendelian randomization(MR) outcome.

Hypertension: A (*ukb-b-14177*), B (*ukb-b-14-57*); Systolic blood pressure: C (*ieu-b-38*), D (*ukb-b-20175*); Diastolic blood pressure: E (*ieu-b-39*), F (*ukb-b-7992*)

Table S1. Details of the UMOD related SNPs. uUMOD related SNPs were derived from the Genome-Wide Association Studies(GWAS) meta-analysis in GWAScatalog. A total of seventeen SNPs associated with uUMOD were from an article published in the Journal of American Society of Nephrology.

| Exposure | SNP        | EA | OA | EAF    | P value   | BETA    | SE     | R <sup>2</sup> |
|----------|------------|----|----|--------|-----------|---------|--------|----------------|
| uUMOD    | rs12917707 | T  | G  | 0.1800 | 7.85E-73  | -0.3200 | 0.0200 | 0.0120         |
|          | rs4494548  | A  | G  | 0.1300 | 3.90E-15  | 0.1700  | 0.0200 | 0.0080         |
|          | rs12446492 | A  | T  | 0.4500 | 5.60E-27  | -0.1500 | 0.0100 | 0.0111         |
|          | rs4533720  | A  | G  | 0.5300 | 3.50E-07  | 0.0700  | 0.0100 | 0.0024         |
|          | rs6988636  | T  | C  | 0.9200 | 9.47E-07  | -0.1300 | 0.0300 | 0.0025         |
| sUMOD    | rs12917707 | T  | G  | 0.1510 | 8.35E-154 | -0.7709 | 0.0280 | 0.1524         |
|          | rs1155876  | C  | T  | 0.0840 | 0.00011   | -0.1280 | 0.0331 | 0.0025         |
|          | rs12446492 | A  | T  | 0.3890 | 1.05E-43  | -0.3293 | 0.0235 | 0.0515         |
|          | rs12708631 | A  | T  | 0.0750 | 0.000241  | -0.1312 | 0.0357 | 0.0024         |
|          | rs12920537 | G  | A  | 0.310  | 1.16E-15  | -0.2360 | 0.0293 | 0.0238         |
|          | rs12920708 | C  | A  | 0.230  | 1.50E-32  | -0.3083 | 0.0257 | 0.0337         |
|          | rs12930599 | A  | G  | 0.2190 | 1.77E-12  | -0.2183 | 0.0309 | 0.0163         |
|          | rs4380062  | T  | C  | 0.0860 | 0.00172   | -0.1215 | 0.0387 | 0.0023         |
|          | rs4462596  | G  | A  | 0.2610 | 0.00159   | -0.0935 | 0.0296 | 0.0034         |
|          | rs4558425  | A  | G  | 0.0580 | 0.000876  | -0.1138 | 0.0342 | 0.0014         |
|          | rs6497445  | C  | T  | 0.1330 | 0.00331   | 0.0886  | 0.0302 | 0.0018         |
|          | rs7187470  | A  | G  | 0.4510 | 0.00011   | 0.1134  | 0.0293 | 0.0064         |
|          | rs7192921  | G  | T  | 0.4060 | 0.00274   | 0.0665  | 0.0222 | 0.0021         |
|          | rs7198000  | A  | G  | 0.1240 | 2.82E-08  | 0.1804  | 0.0324 | 0.0071         |
|          | rs7498776  | C  | T  | 0.0800 | 0.0014    | 0.1040  | 0.0325 | 0.0016         |
|          | rs7499304  | T  | G  | 0.2880 | 0.0002    | -0.1043 | 0.0284 | 0.0045         |
|          | rs8060932  | G  | A  | 0.3150 | 7.23E-09  | 0.1586  | 0.0274 | 0.0109         |

*EA*, Effect allele; *OA*, Other allele; *EAF*, Effect Allele Frequency; *BETA*, Effect size of SNP on uromodulin; *SE*, Standard Error; *uUMOD*, urinary uromodulin; *sUMOD*, serum uromodulin; *SNPs*, Single Nucleotide Polymorphisms

Table S2. The variance (R2) of UMOD-blood pressure pairs.

| Exposure | SNP        | Hypertension |             | Systolic blood pressure |             | Diastolic blood pressure |            |
|----------|------------|--------------|-------------|-------------------------|-------------|--------------------------|------------|
|          |            | ukb-b-14057  | ukb-b-14177 | ieu-b-38                | ukb-b-20175 | ieu-b-39                 | ukb-b-7992 |
| sUMOD    | rs1155876  | 3.54E-07     | 1.46E-07    | 9.98E-06                | 2.65E-06    | 4.09E-07                 | 2.50E-06   |
|          | rs12446492 | 1.57E-05     | 1.59E-05    | 0.021                   | 1.87E-05    | 0.0147                   | 5.27E-05   |
|          | rs12708631 | 1.90E-06     | 2.58E-06    | 6.05E-05                | 1.82E-08    | 0.0001                   | 4.38E-06   |
|          | rs12917707 | 3.92E-05     | 4.02E-05    | 0.0438                  | 2.73E-05    | 0.028                    | 7.91E-05   |
|          | rs12920537 | 4.00E-06     | 4.12E-06    | 0.0024                  | 1.56E-06    | 0.0023                   | 3.15E-06   |
|          | rs12920708 | 2.47E-06     | 2.76E-06    | 0.0014                  | 4.73E-06    | 0.0006                   | 6.13E-06   |
|          | rs12930599 | 4.42E-07     | 1.32E-07    | 0.0002                  | 3.13E-07    | 8.75E-07                 | 1.54E-06   |
|          | rs4380062  | 1.96E-06     | 1.95E-06    | 0.0013                  | 6.51E-07    | 0.0005                   | 8.44E-08   |
|          | rs4462596  | 2.06E-06     | 1.93E-06    | 0.0005                  | 4.24E-06    | 3.65E-05                 | 3.50E-06   |
|          | rs4558425  | 2.96E-07     | 6.00E-09    | 0.0002                  | 4.16E-08    | 9.28E-05                 | 3.22E-07   |
|          | rs6497445  | 1.76E-06     | 1.75E-06    | 0.0002                  | 4.13E-06    | 0.0001                   | 5.52E-06   |
|          | rs7187470  | 2.03E-06     | 1.74E-06    | 0.001                   | 2.31E-07    | 0.0004                   | 2.16E-07   |
|          | rs7192921  | 1.38E-06     | 2.45E-06    | 0.0001                  | 4.71E-08    | 4.41E-05                 | 3.33E-06   |
|          | rs7198000  | 2.64E-06     | 3.40E-06    | 0.0017                  | 2.28E-06    | 0.0012                   | 1.62E-06   |
|          | rs7499304  | 2.64E-07     | 6.14E-08    | 1.78E-05                | 6.15E-08    | 6.38E-05                 | 3.88E-06   |
|          | rs8060932  | 6.48E-06     | 5.65E-06    | 0.0060                  | 2.02E-06    | 0.0045                   | 9.39E-06   |
|          | rs7498776  | 3.71E-06     | 3.10E-06    | NA                      | 1.22E-06    | NA                       | 3.61E-06   |
| uUMOD    | rs12917707 | 3.92E-05     | 4.02E-05    | 0.0438                  | 2.73E-05    | 0.0280                   | 7.91E-05   |
|          | rs4494548  | 6.13E-06     | 6.31E-06    | 0.0014                  | 1.90E-06    | 0.0010                   | 8.08E-06   |

SNP, Single Nucleotide Polymorphism; UMOD, uromodulin

Table S3. Studies of hypertension with data available from the Mendelian randomization (MR)-base.

Outcomes of the "hypertension" and "high blood pressure" searched in MR-base were shown in the table. We selected the ukb-b-14057 and ukb-b-14177 since their largest Ncase and the sample size.

| Trait               | Id.outcome       | Detailed Trait                                                    | Year | Author       | Consortium | Ncase  | Ncontrol | Sample size | NSNPs    |
|---------------------|------------------|-------------------------------------------------------------------|------|--------------|------------|--------|----------|-------------|----------|
| Hypertension        | ukb-a-61         | Non-cancer illness code self-reported: hypertension               | 2017 | Neale        | Neale Lab  | 87690  | 249469   | 337,159     | 10894596 |
|                     | ukb-a-531        | Diagnoses-main ICD10:I10 Essential (primary) hypertension         | 2017 | Neale        | Neale Lab  | 500    | 336699   | 337,199     | 10894596 |
|                     | ukb-b-14057      | Non-cancer illness code, self-reported: hypertension              | 2018 | Ben Elsworth | MRC-IEU    | 119731 | 343202   | 462,933     | 9851867  |
|                     | ukb-b-7582       | Non-cancer illness code, self-reported: essential hypertension    | 2018 | Ben Elsworth | MRC-IEU    | 2095   | 460838   | 462,933     | 9851867  |
|                     | ukb-b-12493      | Diagnoses - secondary ICD10: I10 Essential (primary) hypertension | 2018 | Ben Elsworth | MRC-IEU    | 54358  | 408652   | 463,010     | 9851867  |
|                     | ukb-d-19_HYPTENS | Hypertension                                                      | 2018 | Neale        | NA         | 1237   | 159957   | 361,194     | 9646741  |
| High blood pressure | ukb-a-437        | Vascular/heart problems diagnosed by doctor: High blood pressure  | 2017 | Neale        | Neale Lab  | NA     | NA       | 336683      | 10894596 |
|                     | ukb-b-14177      | Vascular/heart problems diagnosed by doctor: High blood pressure  | 2018 | Ben Elsworth | MRC-IEU    | NA     | NA       | 461880      | 9851867  |

MR, Mendelian randomization; NSNPs, Number of Single Nucleotide Polymorphisms

Table S4. Studies of systolic blood pressure and diastolic blood pressure from the Mendelian randomization (MR)-base. We selected ieu-b-38 and ukb-b-20175 as the outcome of systolic blood pressure, while ieu-b-39 and ukb-b-7992 as the outcome of diastolic blood pressure.

| Trait                    | Id.outcome  | Detailed Trait                              | Year | Author       | Consortium | Sample size | NSNPs    |
|--------------------------|-------------|---------------------------------------------|------|--------------|------------|-------------|----------|
| Systolic blood pressure  | ieu-b-38    | Systolic blood pressure                     | 2018 | Evangelou, E | ICBP       | 757601      | 7088083  |
|                          | ukb-a-360   | Systolic blood pressure automated reading   | 2017 | Neale        | Neale Lab  | 317754      | 10894596 |
|                          | ukb-b-20175 | Systolic blood pressure, automated reading  | 2018 | Ben Elsworth | MRC-IEU    | 436419      | 9851867  |
|                          | ukb-b-6503  | Systolic blood pressure, manual reading     | 2018 | Ben Elsworth | MRC-IEU    | 39749       | 9851867  |
| Diastolic blood pressure | ieu-b-39    | Diastolic blood pressure                    | 2018 | Evangelou, E | ICBP       | 757601      | 7160619  |
|                          | ukb-a-359   | Diastolic blood pressure automated reading  | 2017 | Neale        | Neale Lab  | 317756      | 10894596 |
|                          | ukb-b-7992  | Diastolic blood pressure, automated reading | 2018 | Ben Elsworth | MRC-IEU    | 436424      | 9851867  |
|                          | ukb-b-18240 | Diastolic blood pressure, manual reading    | 2018 | Ben Elsworth | MRC-IEU    | 39749       | 9851867  |

*ICBP*, International Consortium for Blood Pressure; *NSNPs*, Number of Single Nucleotide Polymorphisms

Table S5. Detailed power of each pair.

| <b>Exposure</b> | <b>Outcome</b>             | <b>outcome datasets ID</b> | <b>Power</b>  |
|-----------------|----------------------------|----------------------------|---------------|
| <b>sUMOD</b>    | <b>Hypertension</b>        | <b>ukb-b-14057</b>         | <b>99.60%</b> |
|                 | <b>High blood pressure</b> | <b>ukb-b-14177</b>         | <b>99.60%</b> |
|                 | <b>SBP</b>                 | <b>ieu-b-38</b>            | <b>100%</b>   |
|                 |                            | <b>ukb-b-20175</b>         | <b>93.20%</b> |
|                 | <b>DBP</b>                 | <b>ieu-b-39</b>            | <b>100%</b>   |
|                 |                            | <b>ukb-b-7992</b>          | <b>100%</b>   |
| <b>uUMOD</b>    | <b>hypertension</b>        | <b>ukb-b-14057</b>         | <b>92.80%</b> |
|                 | <b>high blood pressure</b> | <b>ukb-b-14177</b>         | <b>93.40%</b> |
|                 | <b>SBP</b>                 | <b>ieu-b-38</b>            | <b>100%</b>   |
|                 |                            | <b>ukb-b-20175</b>         | <b>75.20%</b> |
|                 | <b>DBP</b>                 | <b>ieu-b-39</b>            | <b>100%</b>   |
|                 |                            | <b>ukb-b-7992</b>          | <b>99.60%</b> |

*UMOD*, uromodulin; *SBP*, Systolic blood pressure; *DBP*, diastolic blood pressure

Figure S1. Leave-one-out method of the Mendelian randomization(MR) outcome.  
Hypertension: A(ukb-b-14177), B(ukb-b-14-57); Systolic blood pressure: C(ieu-b-38),  
D(ukb-b-20175);Diastolic blood pressure: E(ieu-b-39), F(ukb-b-7992)

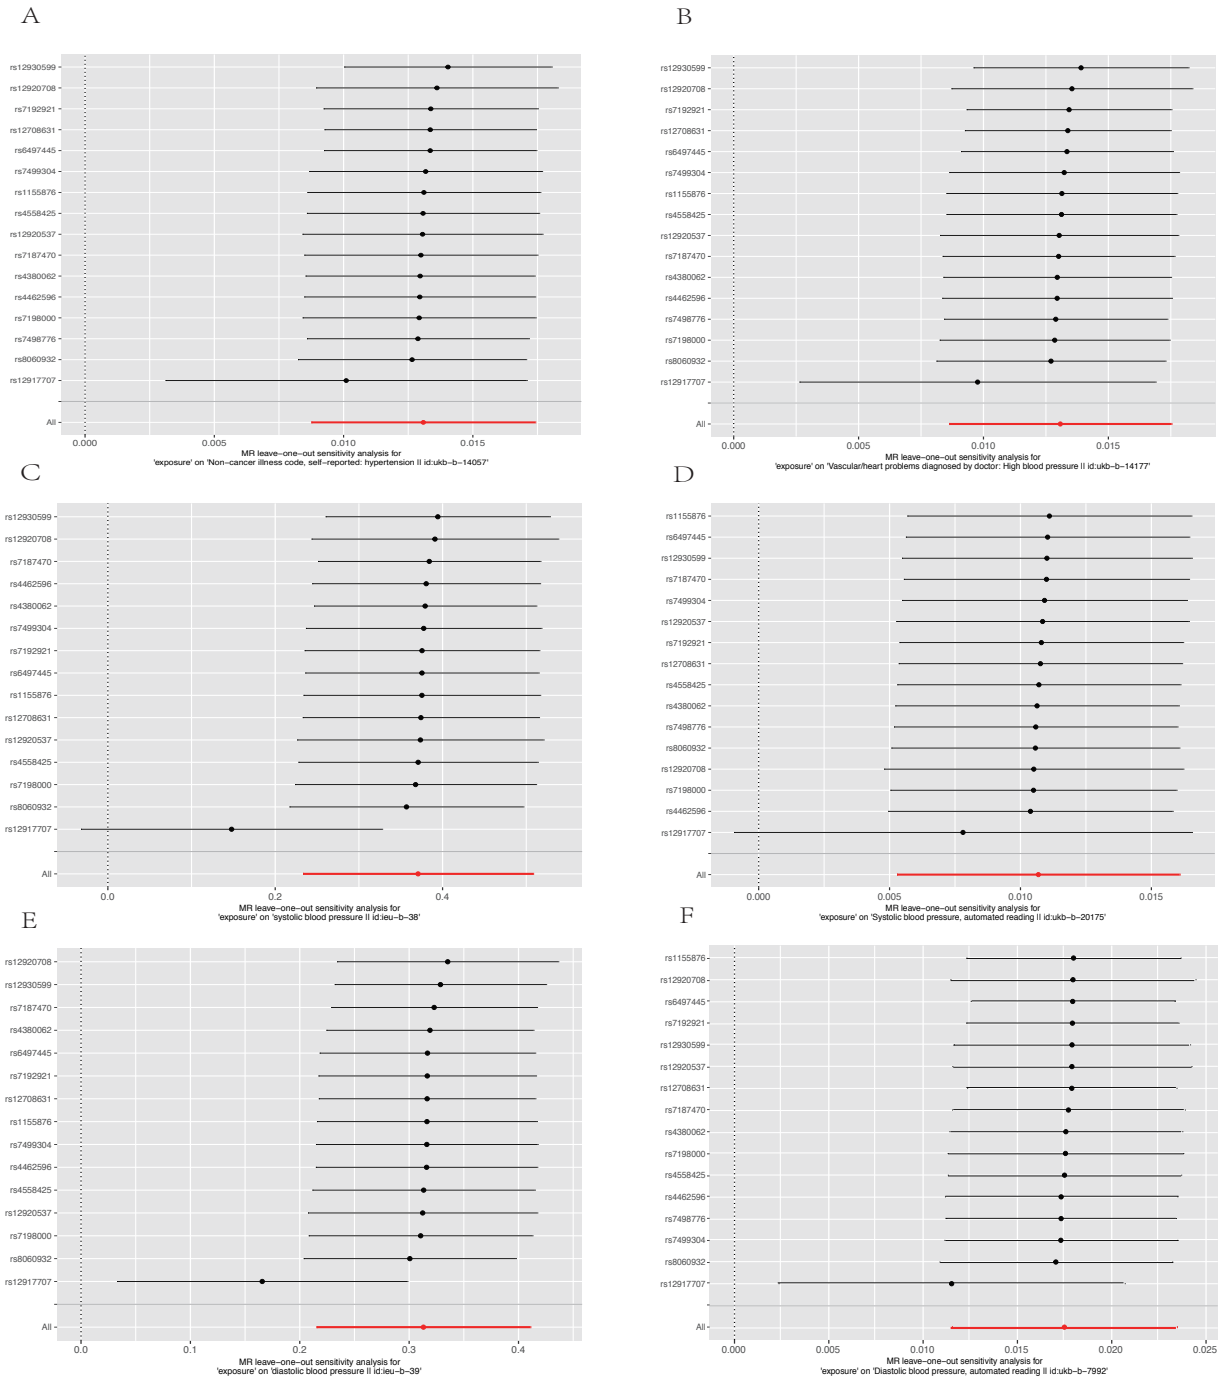

Supplement: Table_1.pdf [file Table_1.pdf]
